# Supplementary material
Source: Springer Nature journal article supplement (https://www.springermedizin.de/resource/supplementary/12872_2014_746_MOESM1_ESM.pdf/9430804)
Supplement: MOESM1 [file 9430804]

**N=366**

**N=96**

**Too few  
HBPM triplets**

**Part 1  
N=270**

**N=95**

**Not selected  
for ABPMs**

**Part 2  
N=175**
